# Supplementary material for: Multicenter validation of an assay to predict anti-PD-1 disease control in patients with recurrent or metastatic Head and Neck Squamous Cell Carcinoma: The PREDAPT Study
Source: bioRxiv or medRxiv preprint supplement (doi:10.1101/2024.05.31.24308285), 2024-06-01
Supplement: Supplementary file [file media-1.pdf]

Table S1: Excluded Patient Samples

|                                                                                                                                    |            |
|------------------------------------------------------------------------------------------------------------------------------------|------------|
| None (included in study)                                                                                                           | 211        |
| Unacceptable Treatment Regimen                                                                                                     | 39         |
| Excessive Time to Treatment                                                                                                        | 18         |
| Unacceptable Specimen Site                                                                                                         | 17         |
| Incomplete Data                                                                                                                    | 14         |
| Insufficient Material                                                                                                              | 10         |
| Other Ineligible*                                                                                                                  | 18         |
| Tumor cellularity                                                                                                                  | 48         |
| Fail RNA QC                                                                                                                        | 13         |
| Fail Library QC                                                                                                                    | 10         |
| Fail Analytical QC                                                                                                                 | 15         |
| Withdrawn                                                                                                                          | 2          |
| <b>Total</b>                                                                                                                       | <b>415</b> |
| <i>Note:</i>                                                                                                                       |            |
| *Includes excluded diagnoses, inconsistent data, site sending wrong material, and other violations of inclusion/exclusion criteria |            |

**Table S2. HUGO gene designations of input genes for model development**

|         |        |         |          |         |          |          |         |
|---------|--------|---------|----------|---------|----------|----------|---------|
| C2      | PTPRC  | HLA-DRA | C1QB     | CD3E    | FCER1G   | C3AR1    | CCL4    |
| DOCK8   | LILRB4 | CCR5    | CCL3L3   | CXCR3   | GZMH     | GPR65    | CD80    |
| STAT2   | DRAM1  | IL21R   | TNFAIP3  | PSMB9   | IL15     | GBP5     | CD300LF |
| RNF19B  | ETV7   | CD96    | CXCL11   | TMEM140 | PLAUR    | ISG20    | IFNG    |
| SLC15A3 | GPR171 | APOL3   | RIPK2    | LILRB2  | SLA2     | ICAM1    | SPI1    |
| IFIT2   | SIRPG  | CCL5    | CD69     | IL15RA  | TRANK1   | CD74     | DOK2    |
| IFI30   | TAP2   | IL2RB   | TRIM21   | HLA-B   | WARS     | GBP2     | STAT4   |
| CXCL10  | PARP14 | CD163   | SP100    | SAMSN1  | PDCD1    | CD2      | CD300A  |
| JAK2    | FPR3   | UHRF2   | NLRC5    | UBA7    | CSF1     | LAG3     | RANBP6  |
| HAPLN3  | SH2D1A | DNAJA1  | ZBP1     | BTN3A1  | IL18BP   | CTSL     |         |
| PLGRKT  | SRGN   | BATF2   | SIGLEC10 | CXCR6   | PDCD1LG2 | CD3G     |         |
| CDC37L1 | UBE2L6 | CD274   | IDO1     | DDX58   | SAMHD1   | GPR84    |         |
| EPST11  | TIGIT  | IFIH1   | BTN3A3   | PPP1R18 | ITGAL    | CIITA    |         |
| HLA-F   | FCGR1A | TNFRSF9 | GZMA     | GBP1    | CCL8     | C1QC     |         |
| ITK     | STAT1  | SP110   | TRIM22   | FGL2    | STX11    | TAP1     |         |
| GPLY    | SLAMF8 | GZMB    | HLA-DRB1 | NKG7    | LAP3     | TNFSF13B |         |
| LCP2    | IL2RA  | FCGR3A  | PRF1     | GBP3    | CTLA4    | IRF1     |         |
| HAVCR2  | APOL6  | IFIT3   | IL12RB1  | MYO7A   | CD86     | ICOS     |         |
| FASLG   | GBP4   | TLR8    | CCR1     | STK10   | CXCL9    | PLA2G7   |         |
| RNF213  | CD8A   | FCGR2A  | PTPN22   | B2M     | RIC1     | SAMD9L   |         |

**Table S3. Inclusion/exclusion criteria**

| Inclusion criteria: |                                                                                                                                                                                                                                                                                                                                                   |
|---------------------|---------------------------------------------------------------------------------------------------------------------------------------------------------------------------------------------------------------------------------------------------------------------------------------------------------------------------------------------------|
| 1.                  | Subject must have been diagnosed with recurrent or metastatic head and neck squamous cell carcinoma (RM-HNSCC).                                                                                                                                                                                                                                   |
| 2.                  | Subject must have received, or been scheduled to receive, at least one dose of anti-PD-1 immunotherapy for treatment of their cancer.                                                                                                                                                                                                             |
| 3.                  | Subject must have received, or been scheduled to receive, anti-PD-1 treatment on one of the following regimens:<br>A. Pembrolizumab or nivolumab as a single agent (monotherapy)<br>B. Pembrolizumab or nivolumab in combination with platinum chemotherapy, with or without fluorouracil or a taxane (chemo-immunotherapy)                       |
| 4.                  | Subject must have had, or will have had, a tumor biopsy prior to treatment with anti-PD-1 immunotherapy (specimen is considered pre-treatment).                                                                                                                                                                                                   |
| 5.                  | Clinician must have evaluated, or will have evaluated, tumor response to anti-PD-1 immunotherapy using (1) imaging data performed to assess response to anti-PD-1 treatment and/or (2) clinical assessment. Imaging data must include both (a) pre-anti-PD-1-treatment imaging and (b) imaging performed after the start of anti-PD-1 treatment). |
| 6.                  | Subject is willing to provide informed consent per IRB-approved protocol.                                                                                                                                                                                                                                                                         |
| 7.                  | Subject must have sufficient tissue available to fulfill the specimen requirements of the study.                                                                                                                                                                                                                                                  |
| 8.                  | Subject is 18 years of age or older.                                                                                                                                                                                                                                                                                                              |
| Exclusion criteria: |                                                                                                                                                                                                                                                                                                                                                   |
| 1.                  | Subjects who did not have head and neck squamous cell carcinoma (other histologies).                                                                                                                                                                                                                                                              |
| 2.                  | Subjects who only received anti-PD-1 immunotherapy in the newly diagnosed, curative setting.                                                                                                                                                                                                                                                      |
| 3.                  | Subjects who received anti-PD-1 immunotherapy in combination with a treatment other than platinum chemotherapy (with or without fluorouracil or a taxane).                                                                                                                                                                                        |
| 4.                  | Subjects whose response to anti-PD-1 immunotherapy is not available either as (a) clinician's evaluation of that response or (b) imaging data that was performed to assess response to anti-PD-1 immunotherapy.                                                                                                                                   |

**Table S4.** OncoPrism-HNSCC model is not predictive in non-ICI datasets

| dataset   | Number of samples | OncoPrism-HNSCC model |
|-----------|-------------------|-----------------------|
| TCGA-HNSC | 500               | 0.32                  |
| GSE65858  | 290               | 0.66                  |
| GSE40774  | 90                | 0.56                  |
| GSE41613  | 97                | 0.71                  |

\*Notes: the p-values represent p-values for log rank test done on a Cox proportional hazards model.

**Table S5.** PD-L1 performance metrics

| <b>Cohort</b>                  | <b>Comparison</b> | <b>Accuracy</b> | <b>PPV*</b> | <b>NPV*</b> | <b>Sensitivity</b> | <b>Specificity</b> |
|--------------------------------|-------------------|-----------------|-------------|-------------|--------------------|--------------------|
| Cohort 1 (monotherapy)         | CPS<1 vs CPS≥1    | 52%             | 48%         | 75%         | 93%                | 18%                |
| Cohort 1 (monotherapy)         | CPS<20 vs CPS≥20  | 58%             | 55%         | 60%         | 43%                | 71%                |
| Cohort 2 (chemo-immunotherapy) | CPS<1 vs CPS≥1    | 60%             | 60%         | 60%         | 93%                | 15%                |
| Cohort 2 (chemo-immunotherapy) | CPS<20 vs CPS≥20  | 60%             | 76%         | 52%         | 46%                | 80%                |

\*Notes: PPV=positive predictive value; NPV=negative predictive value

Table S6: Comparison of OncoPrism and PD-L1 CPS

|              | PD-L1 TP | PD-L1 FN | PD-L1 TN | PD-L1 FP |
|--------------|----------|----------|----------|----------|
| OncoPrism TP | 32       | 1        | -        | -        |
| OncoPrism FN | 21       | 3        | -        | -        |
| OncoPrism TN | -        | -        | 8        | 32       |
| OncoPrism FP | -        | -        | 1        | 14       |

**Abbreviations:**

TP, True Positive, correctly predicted disease control;

FN, False Negative, disease control incorrectly predicted as no disease control;

TN, True Negative, correctly predicted no disease control;

FP, False Positive, no disease control incorrectly predicted as disease control

Table S7: Comparison of OncoPrism and TMB

|              | TMB TP | TMB FN | TMB TN | TMB FP |
|--------------|--------|--------|--------|--------|
| OncoPrism TP | 2      | 9      | -      | -      |
| OncoPrism FN | 1      | 1      | -      | -      |
| OncoPrism TN | -      | -      | 10     | 0      |
| OncoPrism FP | -      | -      | 9      | 0      |

*Abbreviations:*

TP, True Positive, correctly predicted disease control;

FN, False Negative, disease control incorrectly predicted as no disease control;

TN, True Negative, correctly predicted no disease control;

FP, False Positive, no disease control incorrectly predicted as disease control

**Figure S1: PD-L1 does not predict PFS**

**A**

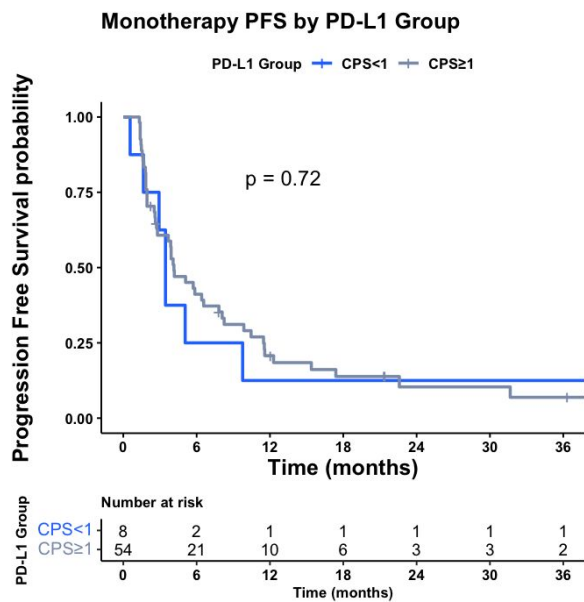

**B**

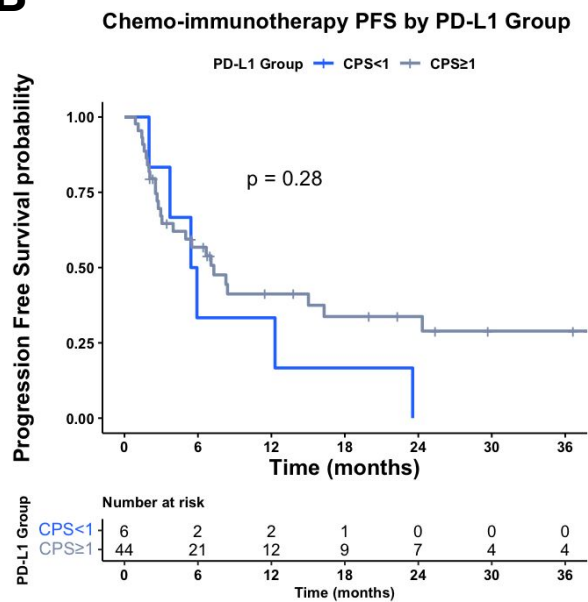



**Figure S2: OncoPrism-HNSCC predicts PFS in PD-L1 positive patients**

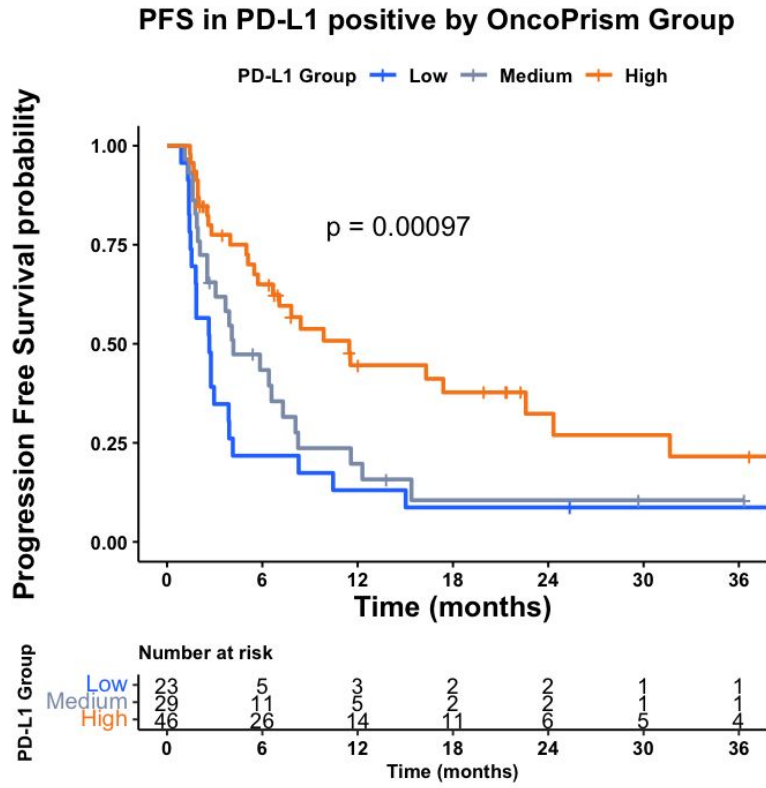

**Figure S3.** Discordant PD-L1/TMB Rate and Treatment Prioritization

**A**

| PD-L1 Discordance Treatment Prioritization |                                 |                                  |
|--------------------------------------------|---------------------------------|----------------------------------|
|                                            | PD-L1 (-)                       | PD-L1 (+)                        |
| OncoPrism-HNSCC Low                        | <b>non-ICI</b><br>(7% of study) | <b>non-ICI</b><br>(31% of study) |
| OncoPrism-HNSCC High                       | <b>ICI</b><br>(3% of study)     | <b>ICI</b> (60% of study)        |

**B**

| TMB Discordance Treatment Prioritization |                                  |                                 |
|------------------------------------------|----------------------------------|---------------------------------|
|                                          | TMB-Low                          | TMB-High                        |
| OncoPrism-HNSCC Low                      | <b>non-ICI</b><br>(34% of study) | <b>non-ICI</b><br>(3% of study) |
| OncoPrism-HNSCC High                     | <b>ICI</b><br>(56% of study)     | <b>ICI</b><br>(6% of study)     |
